# Supplementary figures and images for: Histone variant H3.3 orchestrates neural stem cell differentiation in the developing brain
Source: PubMed Central journal article supplement — Cell Death Differ. 2017 May 19;24(9):1548–63. doi: 10.1038/cdd.2017.77 (PMC5563987; doi:10.1038/cdd.2017.77), 2017-05-19

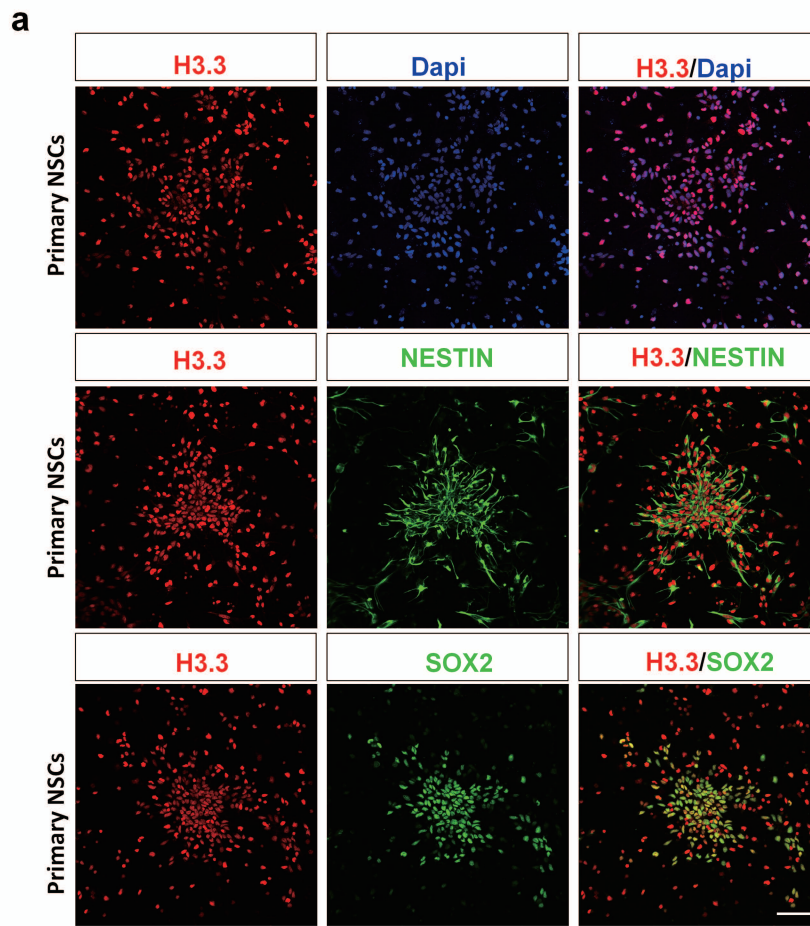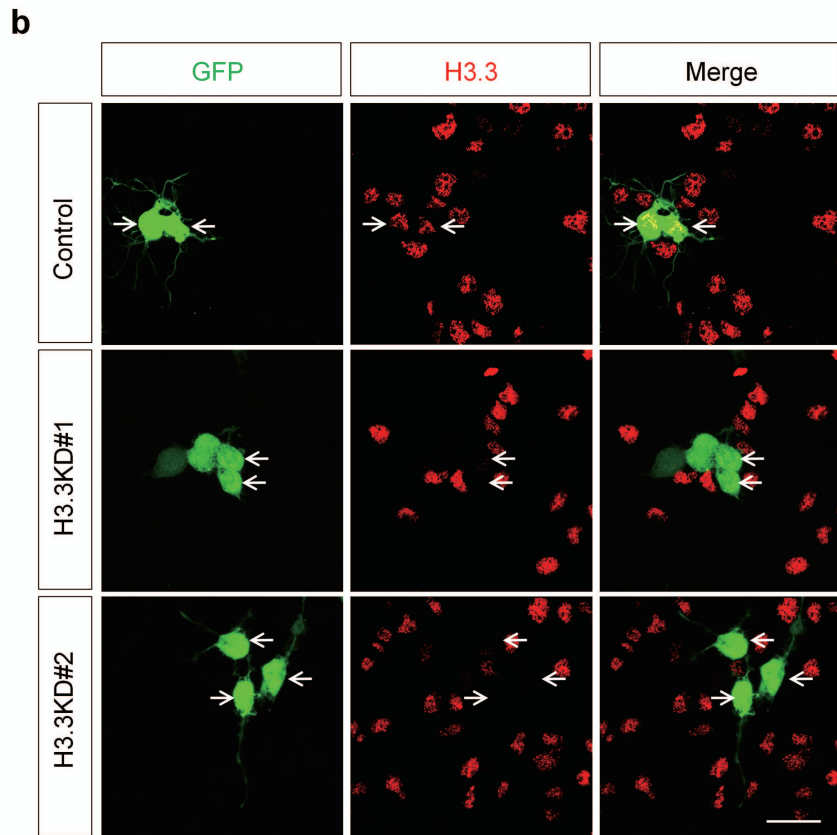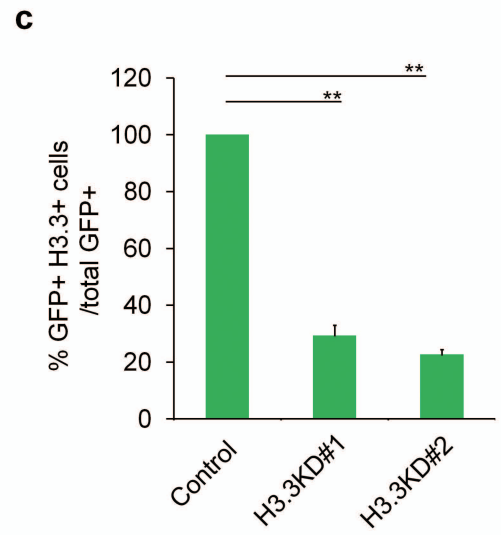

Supplement: cdd201777x1.pdf [file cdd201777x1.pdf]

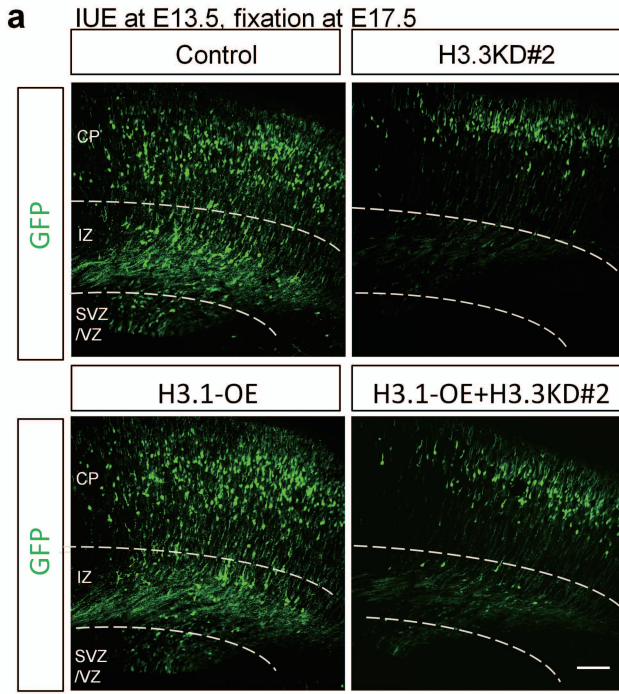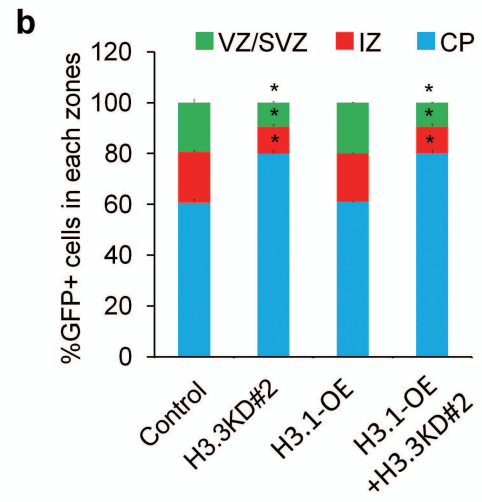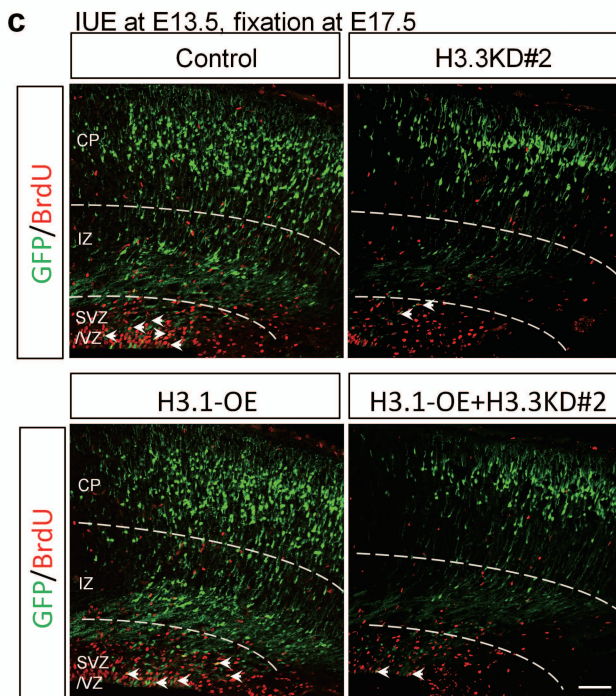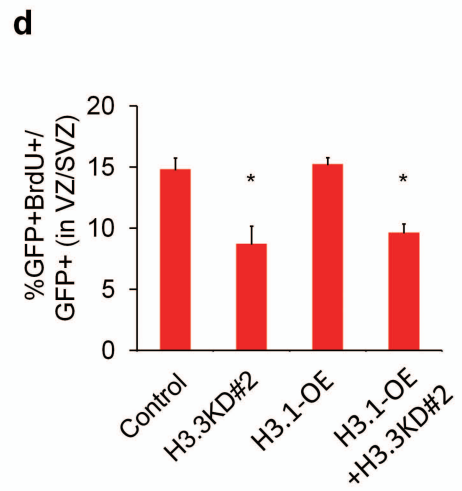

Supplement: cdd201777x2.pdf [file cdd201777x2.pdf]

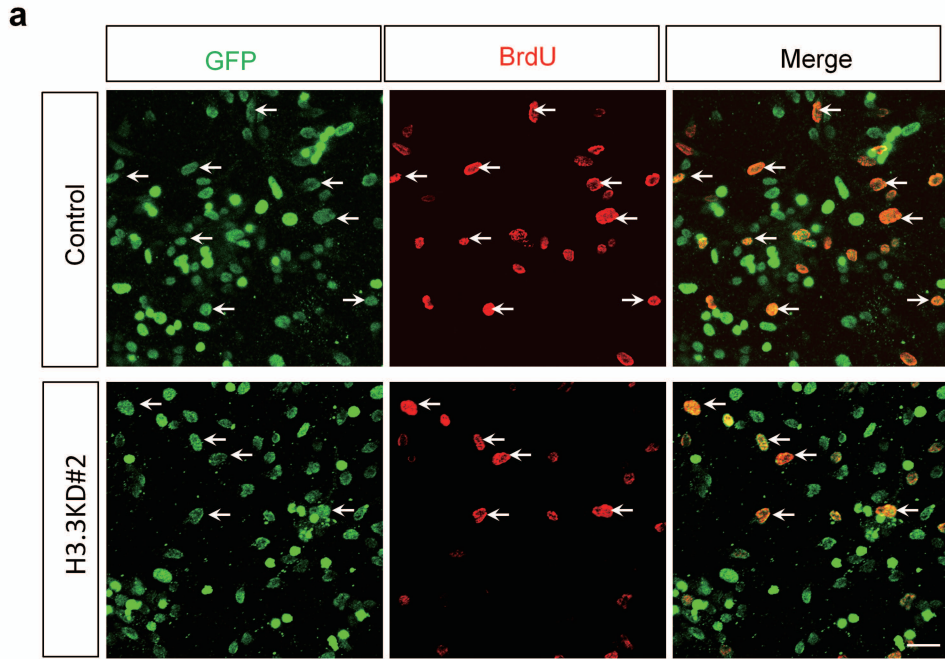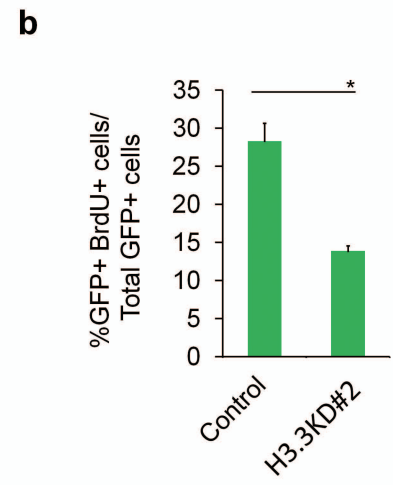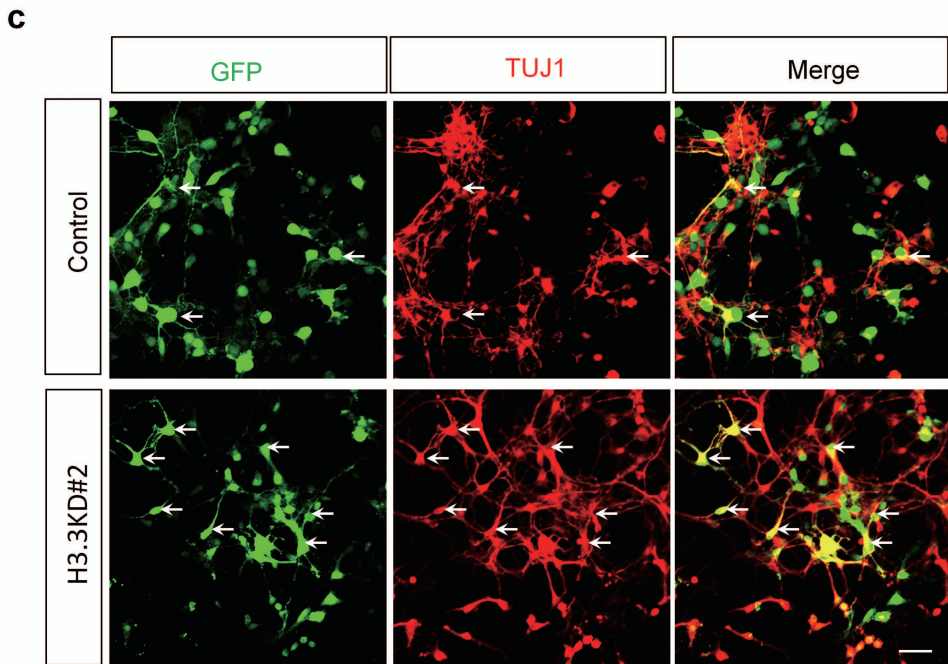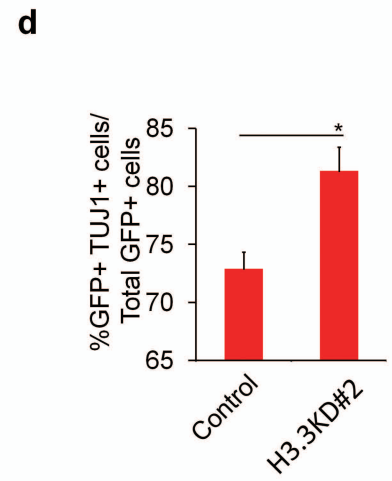

Supplement: cdd201777x3.pdf [file cdd201777x3.pdf]

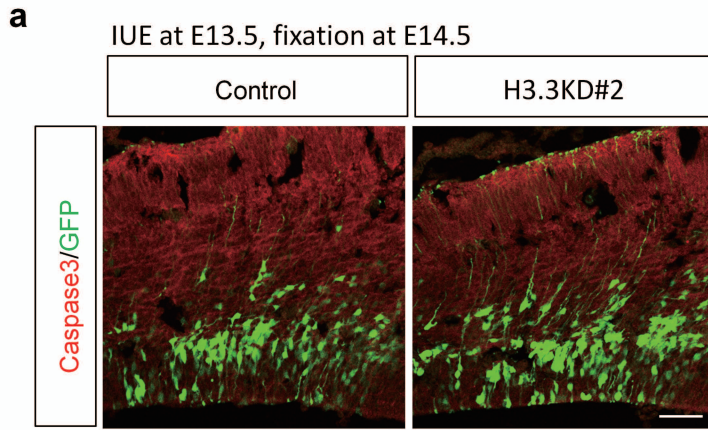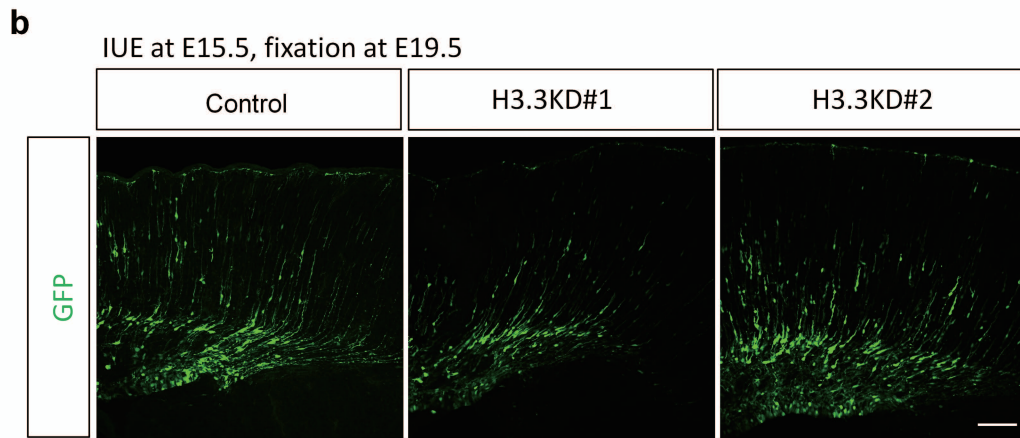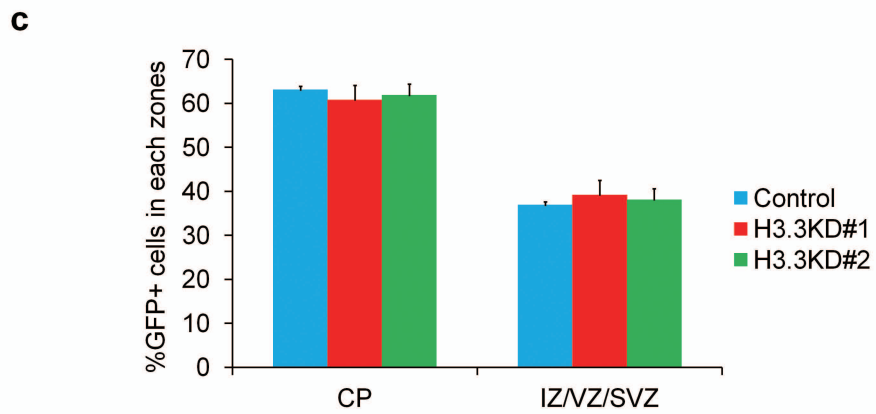

Supplement: cdd201777x4.pdf [file cdd201777x4.pdf]

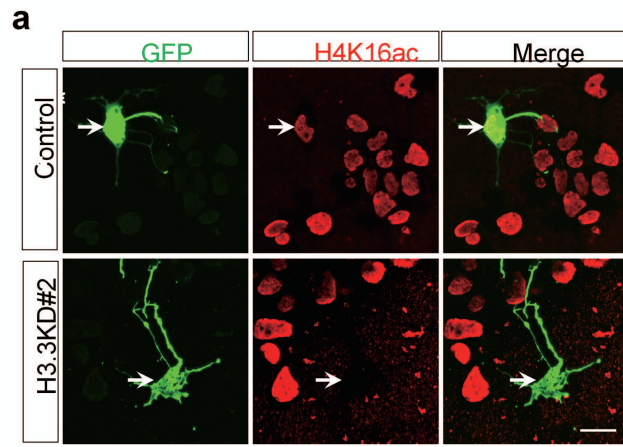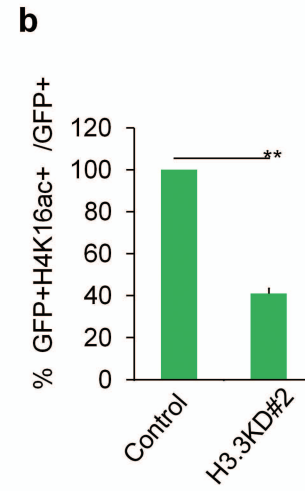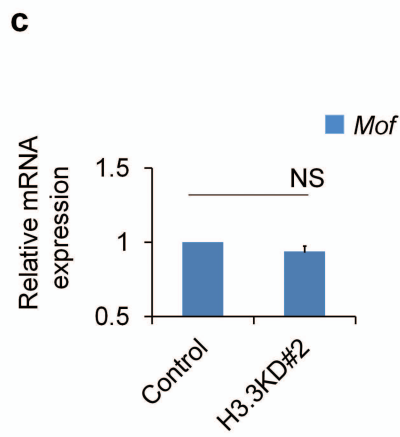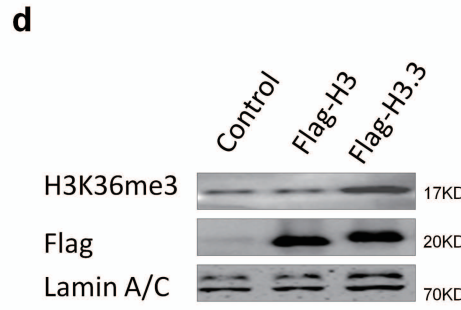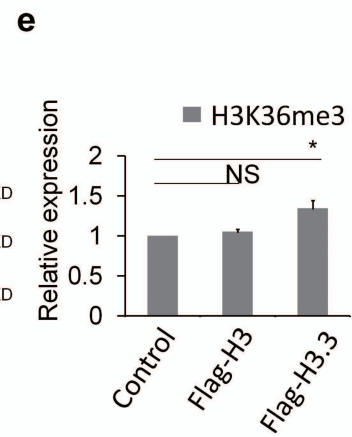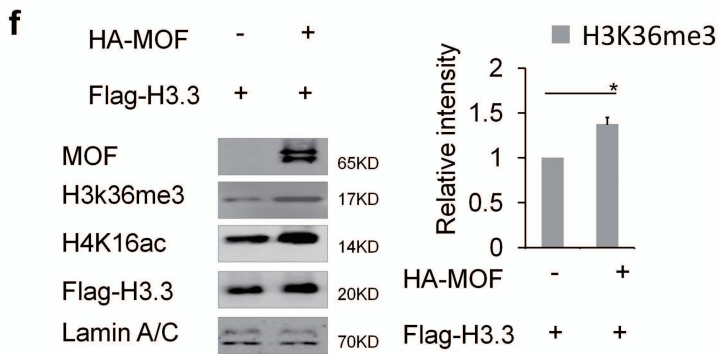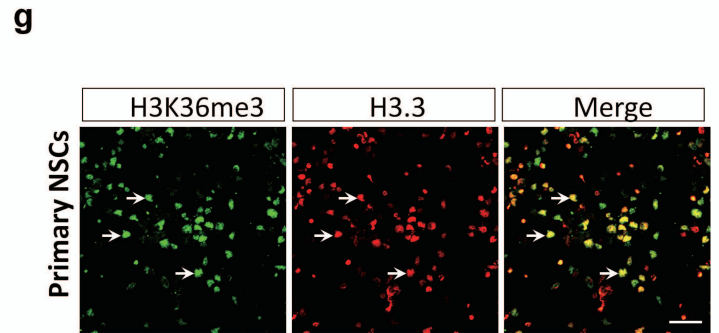

Supplement: cdd201777x5.pdf [file cdd201777x5.pdf]

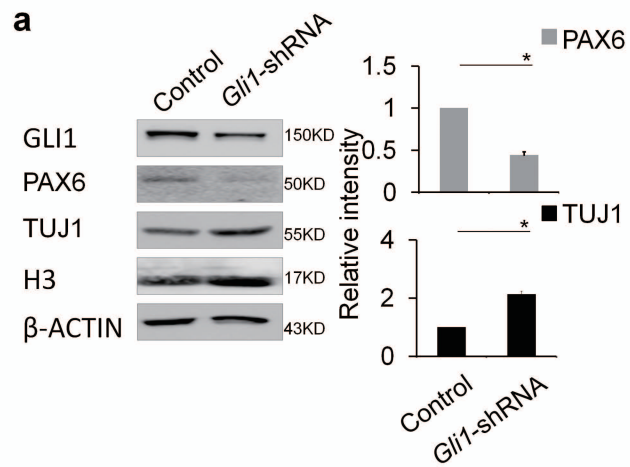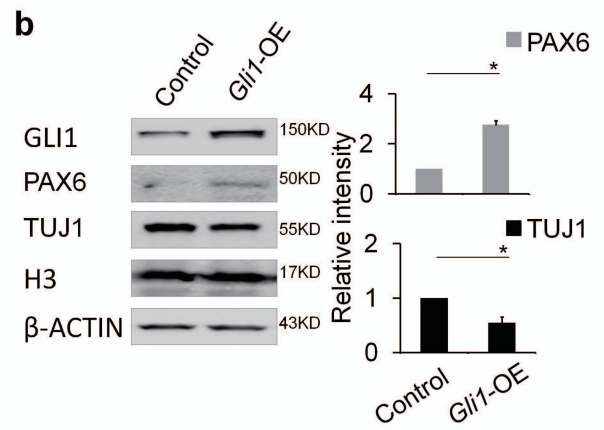

Supplement: cdd201777x6.pdf [file cdd201777x6.pdf]

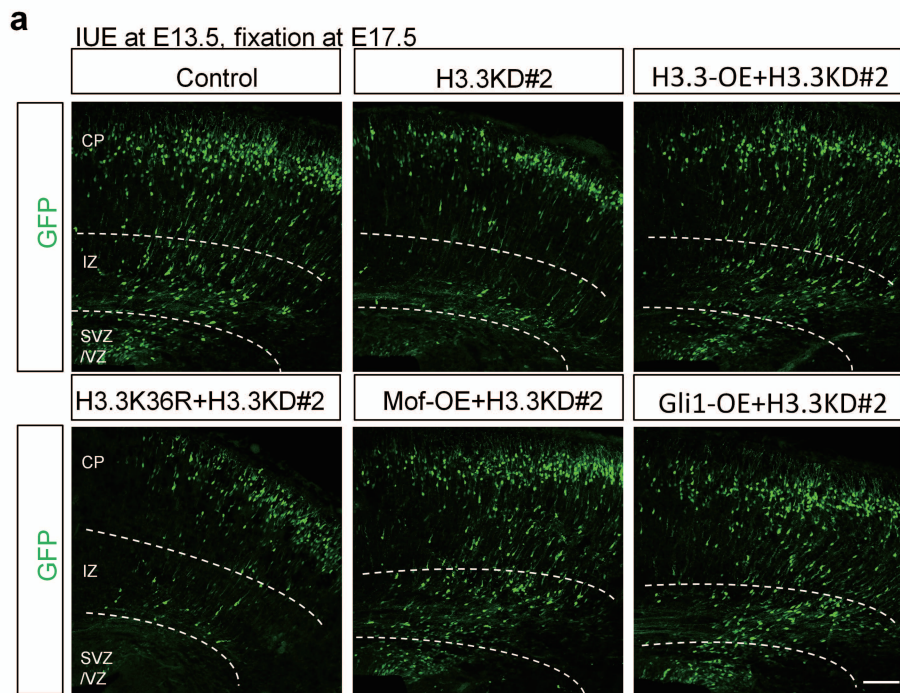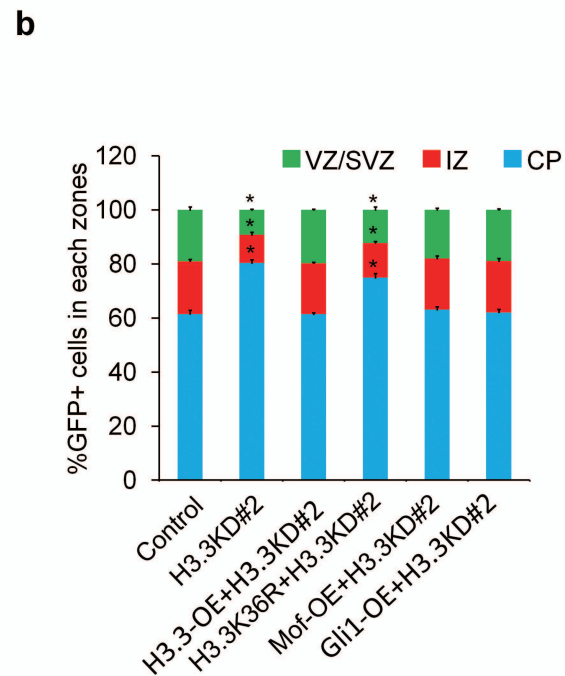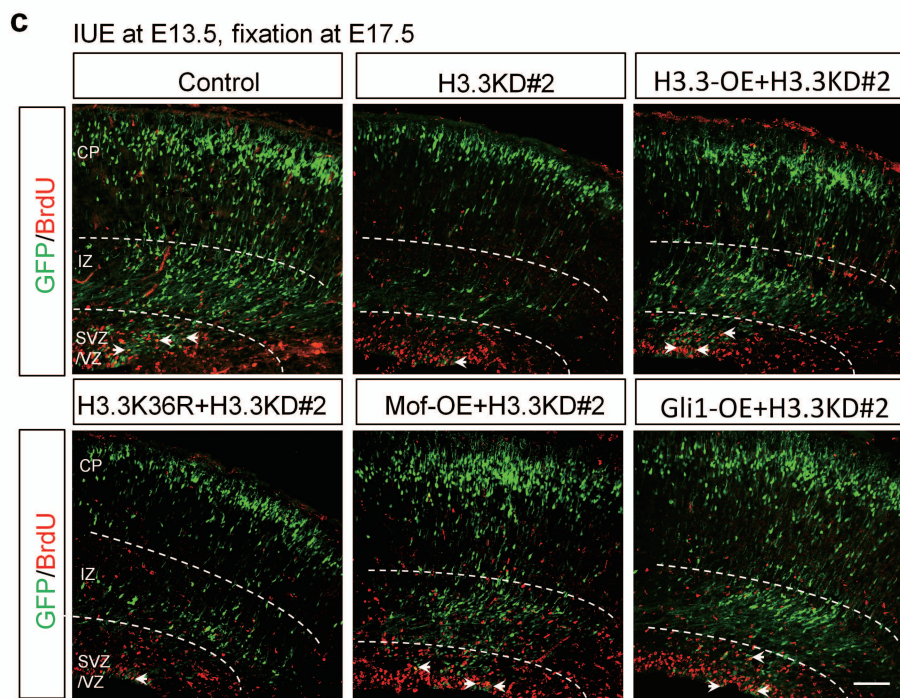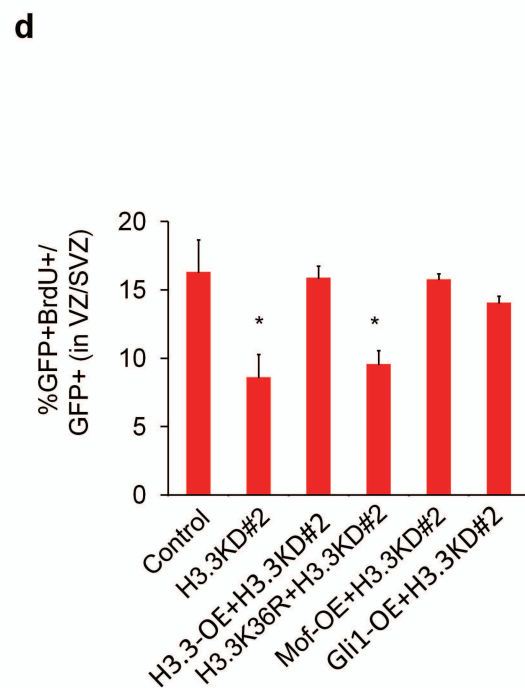

Supplement: cdd201777x7.pdf [file cdd201777x7.pdf]
